## RESEARCH ARTICLE

## Evaluation of the Pint of Science festival in Thailand

Bipin Adhikari<sup>1,2</sup>, Phyu Hnin Hlaing<sup>1</sup>, Matthew T. Robinson<sup>2,3</sup>, Andrea Ruecker<sup>1,2</sup>, Noel Hidalgo Tan<sup>4</sup>, Nattapat Jatupornpimol<sup>1,2</sup>, Rita Chanviriyavuth<sup>1</sup>, Phaik Yeong Cheah<sup>1,2,5\*</sup>

**1** Mahidol-Oxford Tropical Medicine Research Unit, Faculty of Tropical Medicine, Mahidol University, Bangkok, Thailand, **2** Centre for Tropical Medicine and Global Health, Nuffield Department of Medicine, University of Oxford, Oxford, United Kingdom, **3** Lao-Oxford-Mahosot Hospital-Wellcome Trust Research Unit (LOMWRU), Microbiology Laboratory, Mahosot Hospital, Vientiane, Laos, **4** Southeast Asian Regional Centre for Archaeology and Fine Arts (SEAMEO SPAFA), Bangkok, Thailand, **5** The Ethox Centre, Nuffield Department of Population Health, University of Oxford, Oxford, United Kingdom

\* [phaikyeong@tropmedres.ac](mailto:phaikyeong@tropmedres.ac)

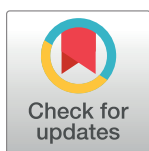

## Abstract

## OPEN ACCESS

**Citation:** Adhikari B, Hlaing PH, Robinson MT, Ruecker A, Tan NH, Jatupornpimol N, et al. (2019) Evaluation of the Pint of Science festival in Thailand. PLoS ONE 14(7): e0219983. <https://doi.org/10.1371/journal.pone.0219983>

**Editor:** J. Alberto Conejero, IUMPA - Universitat Politècnica de Valencia, SPAIN

**Received:** January 18, 2019

**Accepted:** July 5, 2019

**Published:** July 18, 2019

**Copyright:** © 2019 Adhikari et al. This is an open access article distributed under the terms of the [Creative Commons Attribution License](https://creativecommons.org/licenses/by/4.0/), which permits unrestricted use, distribution, and reproduction in any medium, provided the original author and source are credited.

**Data Availability Statement:** The data are available upon request to the Mahidol-Oxford Tropical Medicine Research Unit Data Access Committee (<http://www.tropmedres.ac/data-sharing>) complying with the data access policy ([http://www.tropmedres.ac/\\_asset/file/data-sharing-policy-v1-0.pdf](http://www.tropmedres.ac/_asset/file/data-sharing-policy-v1-0.pdf)).

**Funding:** This work is funded in part by a Wellcome Trust Provision for Public Engagement and a Wellcome Trust Strategic Award (096527). The Mahidol-Oxford Tropical Medicine Research

## Background

The Pint of Science festival is the biggest annual international science festival. In May 2017, we coordinated the first Pint of Science festival in Thailand and reported our initial reflections. Building on this work, we set out to evaluate more systematically events conducted in 2018.

## Methods

In 2018, we conducted Pint of Science events at four different locations in Bangkok. Overall, there were 18 talks held over six event-days in 2018. We administered 180 self-reported questionnaires as well as conducted 11 semi-structured interviews and a focus group discussion with audience members and speakers.

## Results

Of the 180 questionnaires handed out, 125 attendees completed the questionnaire. The majority of attendees came because they were interested in science (68.0%), to learn something new (46.4%) and to enjoy themselves (44.8%). Our qualitative results confirm the quantitative findings. In addition, speakers viewed that they benefited by improving their communication skills and having the opportunity to network with scientists and non-scientists. Speakers also mentioned that such events were a good means to engage with the public, can improve the visibility of their work and potentially attract more funding. To improve the Pint of Science activities, audience members suggested to include a more diverse range of topics, more collaborations with other local research institutions and to hold the event at larger venues.

Unit are funded by the Wellcome Trust (106698/Z/14/Z).

**Competing interests:** The authors have declared that no competing interests exist.

## Conclusions

We conclude that Pint of Science was well received in Bangkok with recommendations to improve minor issues related to practicalities and logistics.

## Introduction

The Pint of Science festival is the biggest annual international science festival held over three days in May each year [1, 2]. The festival began in 2013 and was first held in fifteen pubs across three cities in the United Kingdom (London, Oxford, and Cambridge) [1, 3]. In May 2017, the Mahidol-Oxford Tropical Medicine Research Unit (MORU) coordinated the first Pint of Science festival in Asia [4]. The event which was held in Bangkok, Thailand, followed the standard Pint of Science festival program, with three event nights, each consisting of three different talks from researchers working locally [4].

Typically, Pint of Science events are held in a relaxed and enjoyable environment where members of the general public could meet and interact directly with scientists [1, 3]. Researchers across all fields of science and from all academic levels (PhD students, postdoctoral researchers and senior professors) give short, interesting, and interactive talks about their current research, while audience members get the opportunity to ask questions and have discussions with scientists and each other. The ethos of Pint of Science is similar to that of science cafés i.e. “a place where for a price of a cup of coffee or a glass of wine, anyone can meet to discuss the latest ideas of science that are impacting society” [5]. In recent years, science cafés and events of similar nature such as “Nerd Nite” have increased in number around the globe including in Southeast Asia such as in Thailand, Malaysia, Cambodia, Laos and Hong Kong [6–8].

Pint of Science Thailand (PoST) is one of a range of public engagement activities coordinated by the MORU, a Wellcome-funded research unit based in Bangkok. MORU’s portfolio includes targeted engagement around specific research studies [9–17], activities with the wider public such as science-themed theatre [12, 16, 18] and public engagement activities such as science café talks [6, 7] and PoST events.

In 2017, we reported our initial reflections on PoST 2017 events based on information such as attendance numbers, and comments on sticky notes and social media [19]. Building on this work, we set out to evaluate more systematically events conducted in 2018. This paper describes the results of the quantitative questionnaires, supplemented by interviews and focus group discussions conducted with audience members, speakers and organizers of PoST 2018.

## Materials and methods

### Pint of Science Thailand 2018 events

In 2018, we conducted PoST at four different locations in central Bangkok, Thailand held on 1<sup>st</sup> February, 15<sup>th</sup>, 16<sup>th</sup>, 17<sup>th</sup> and 19<sup>th</sup> May and 23<sup>rd</sup> August 2018. The May event coincided with the international Pint of Science 2018 festival. The February and August events were one-night only, stand-alone events which we called Pint of Science “Shots” to differentiate them from the May 2018 event. Overall, there were 18 talks held over six event-days in 2018. Talks were delivered in English on five event days, and in Thai on one event day (19<sup>th</sup> May). Talks were between 12 to 20 minutes in length followed by discussions (Table 1). There were intermissions between talks so that audience members can interact with speakers, mingle and get

**Table 1. Pint of Science events and the details.**

| Date                           | Location           | Events description                                                                                                                                                                                          |
|--------------------------------|--------------------|-------------------------------------------------------------------------------------------------------------------------------------------------------------------------------------------------------------|
| 1 <sup>st</sup> February, 2018 | Ari, Bangkok       | <b>How does travel impact infection?</b> by Dr. Ipsita Sinha from Mahidol-Oxford Tropical Medicine Research Unit, Bangkok                                                                                   |
|                                |                    | <b>You are what you eat</b> by Dr. Thanik Lertcharnrit, Department of Archeology, Silpakorn University                                                                                                      |
|                                |                    | <b>Numbers</b> by Prof. Sir Nicholas White from Mahidol-Oxford Tropical Medicine Research Unit, Bangkok                                                                                                     |
| May 15 <sup>th</sup> , 2019    | Ari, Bangkok       | <b>Survival of <i>Leptospira</i> and <i>Burkholderia pseudomallei</i> in common drinks</b> by Dr. Vanaporn Wuthiekanun, Department of Microbiology, Mahidol-Oxford Tropical Medicine Research Unit, Bangkok |
|                                |                    | <b>Signatures of Selection</b> by Prof. Olivo Miotto, Centre for Genomics and Global Health, Mahidol-Oxford Tropical Medicine Research Unit, Bangkok                                                        |
|                                |                    | <b>Resistance to antibiotics: slowing down to win the race</b> by Dr. Thomas Althaus, Economic and Translational Research Group, Mahidol-Oxford Tropical Medicine Research Unit, Bangkok                    |
| May 16 <sup>th</sup> , 2018    | Ari, Bangkok       | <b>Why is the sky dark at night?</b> by Dr. Rob Knoops from Particle Physics Research Laboratory, Chulalongkorn University                                                                                  |
|                                |                    | <b>Bacterial morphology: why bacteria care how they look?</b> by Ms. Suparat Giengkam, Department of Microbiology, Mahidol-Oxford Tropical Medicine Research Unit, Bangkok                                  |
|                                |                    | <b>Controlled Human Malaria Infection studies</b> by Prof. Nicholas PJ Day, Director, Mahidol-Oxford Tropical Medicine Research Unit, Bangkok                                                               |
| May 17 <sup>th</sup> , 2018    | Ari, Bangkok       | <b>Turning Passion in Enzymes into Innovations</b> by Prof. Pimchai Chaiyen, Mahidol University & Vidyasirimedhi Institute of Science and Technology                                                        |
|                                |                    | <b>Invasive species, New Guinea Flatworm and Its Potential Role of Eosinophilic Meningoencephalitis in Thailand</b> by Dr. Kittipong Chaisiri, Department of Helminthology, Mahidol University              |
|                                |                    | <b>Hidden Messages behind Beautiful Biological Structures</b> by Dr. Puey Ounjai, Center of Nanoimaging & Department of Biology, Mahidol University                                                         |
| May 19 <sup>th</sup> , 2018    | Bang Rak, Bangkok  | <b>Sea-level Changes and Its Problematics on Studying Dvaravati Culture</b> by Dr. Trongjai Hutangkura, Princess Maha Chakri Sirindhorn Anthropology Centre                                                 |
|                                |                    | <b>HIV/AIDS: Myths vs Evidence</b> by Dr. Rapheephan Maude, Department of Epidemiology, Mahidol-Oxford Tropical Medicine Research Unit, Bangkok                                                             |
|                                |                    | <b>What we know and what we should know about research and fieldwork</b> by Ms. Ravikanya Praphasavat, Mahidol-Oxford Tropical Medicine Research Unit, Bangkok                                              |
| 23 <sup>rd</sup> August, 2018  | Ploenchit, Bangkok | <b>Pandora's Pets</b> by Dr. Matthew Robinson from Lao-Oxford-Mahosot Hospital Wellcome Trust Research Unit, Vientiane, Laos.                                                                               |
|                                |                    | <b>The sex lives of malaria parasites</b> by Dr. Andrea Ruecker, Mahidol-Oxford Tropical Medicine Research Unit, Bangkok.                                                                                   |
|                                |                    | <b>How do archaeologists know where to dig?</b> by Dr. Noel Hidalgo Tan from Southeast Asian Regional Centre for Archaeology and Fine Arts (SEAMEO SPAFA), Bangkok, Thailand                                |

<https://doi.org/10.1371/journal.pone.0219983.t001>

snacks and drinks. Unlike other Pint of Science (PoS) events, all PoS events in Thailand were free in order to encourage participation from a wide range of audiences including students. We also provided a small snack and a soft drink to each attendee.

Events were advertised on the PoST website ([www.pintofscienceth.com](http://www.pintofscienceth.com)) and social media platforms such as Facebook, Twitter and the PoST Meetup page (<https://www.meetup.com/Pint-of-Science-Thailand/>). Emails were also sent out to previous PoST attendees, the MORU internal mailing list and personal mailing lists of the organizing committee members and speakers.

Potential speakers were invited by the organizing committee members and through personal contacts. For the PoST 2018 main event in May 2018, talks were grouped according to the themes chosen by the PoS international team: Infection, Microwaves to Microbes, Our World and Humans [4]. Speakers were provided standard PoS guidelines on how to prepare their talks around a month before the event and were advised to prepare 10–12 minute talks with minimal number of presentation slides, and minimize/explain the use of jargons or technical terms. No formal training was provided. However, guidance on how to prepare the talks including the suggestions on the content and practice sessions were offered based on the case-by-case assessment. A member of the PoST organizing committee served as the Scientific Content Manager (AR) and as a point-of-contact and scientific content curator to all speakers.

## Quantitative data collection

**Questionnaire design.** A self-reported questionnaire was designed in English following published guidelines on designing questionnaires for evaluations [20, 21]. The questions were derived from reviews of published literature [21], mostly reports and guidance on evaluation of public engagement activities [22–24]. Apart from demographic and general questions (questions 1–8), the questionnaire consisted of questions related to motivation of attending PoST (question 9), level of participation (questions 10–12), knowledge and interest in science (questions 13–15), enjoyment (question 16) and level of satisfaction with various aspects of the event (question 17) (S1 Table). There were additional questions for speakers to provide their feedback on their experience as speakers. The draft questionnaire underwent pilot testing among PoST committee and audience members to resolve the issues of ambiguity and incomprehensibility. The final version of the questionnaire was translated to Thai. Both the final English and Thai versions were used in the evaluation. Participants were given the option of leaving their contact details should they wish to be contacted to participate in the semi-structured interviews (SSI) and a focus group discussion (FGD) for more in-depth discussions (S2 and S3 Tables).

**Respondents of the questionnaire.** The quantitative evaluation was conducted for all events in May and August 2018 (not February 2018 because the questionnaire was not ready yet at the time). Based on the registration logbook, a total of 180 entries were recorded over five event days. This number included speakers, organizing committee and audience members. All attendees at the May and August events were handed the questionnaire printed on A4 paper in either Thai or English, and a pen at registration.

**Data management and analysis.** All collected data were entered into a Microsoft Excel database and were analyzed using the IBM Statistical Package for the Social Sciences (SPSS) version 24.0, Armonk, NY: IBM Corp. The descriptive analyses included descriptive statistics such as frequency, mean and percentage. Inferential analyses were made to calculate the total median score on their overall ratings using a likert scale on following variables (questions 14–17): 1. Respondents learnt new knowledge from the events (score range = 0–5); 2. Current event increased their interest in science (score range = 0–5); 3. Enjoyed the event (score range = 0–5); and 4. Satisfaction in terms of venue (score range = 0–5); speakers (score range = 0–5); timing (score range = 0–5); content (score range = 0–5); and opportunity for interactions (score range = 0–5). The calculated overall score derived from the likert scale questions is termed as “audience score” in this article and is treated as a dependent variable. Minimum and maximum value for audience score ranges from 0 to 40. Median values of audience score were compared between various categories of participants (treated as independent variables; questions 1–13), for example age groups, gender, previous visits to other MORU-organized events and the responses to questions such as ‘yes’ and ‘no’.

Mann Whitney U and Kruskal Wallis tests were used to test the differences in median scores. In addition, one specific variable that was designed to assess respondents’ prior knowledge (question 13) and learnt knowledge on presented topic (question 14) was analysed using t-test (it was treated as a before and after variable and mean score was compared) for repeated measure. The difference in mean and median scores were statistically considered significant if p-value was less than 0.05.

## Qualitative data collection

**Semi-structured interview (SSI) guide and focus group discussion (FGD) guide.** A semi-structured interview guide (SSI) and a focus group discussion (FGD) guide consisted of the following themes (1) entertainment value of the PoST events, (2) general benefits of the

Table 2. Demographics of SSI and FGD participants.

| ID    | Gender           | Age (years) | Nationality | Occupation          |
|-------|------------------|-------------|-------------|---------------------|
| SSI1  | Female           | 25–35       | Thai        | Science field       |
| SSI2  | Male             | 20–30       | Thai        | Science field       |
| SSI3  | Male             | 30–40       | American    | Businessman         |
| SSI4  | Female           | 20–30       | Thai        | Science field       |
| SSI5  | Male             | 25–35       | British     | Science field       |
| SSI6  | Female           | 25–35       | Thai        | Science field       |
| SSI7  | Female           | 45–50       | Australian  | Training consultant |
| SSI8  | Female           | 20–30       | Thai        | Science field       |
| SSI9  | Male             | 25–35       | Thai        | Science field       |
| SSI10 | Female           | 25–30       | Thai        | Science field       |
| SSI11 | Female           | 25–35       | British     | Science field       |
| FGD   | 2 Female, 1 Male | 20–30       | All Thai    | Science field       |

<https://doi.org/10.1371/journal.pone.0219983.t002>

event, (3) changes felt by respondents at individual level and (4) recommendations for improvements.

**SSI and FGD participants.** All participants who agreed to be contacted were invited to participate in an SSI or a FGD. Of those invited, fourteen accepted the invitation. All SSIs and FGDs were conducted at a time and location convenient for the participants (Table 2). Of the fourteen who accepted the invitation, eleven participated in SSIs and three participants (they came together) opted for a FGD. Two authors (BA and PHH) interviewed these participants in English. All interviews were audio-recorded and transcribed verbatim. All the transcripts were analysed (coded line by line) using pre-set themes described above using QSR Nvivo Qualitative software. Any emerging themes were identified and coded.

### Ethical approval and consent to participate

This initiative was considered as a program/service evaluation and therefore was exempted from ethics review by Oxford Tropical Research Ethics Committee, University of Oxford. Oral informed consent was obtained from each participant before the interviews or focus group discussions were conducted.

## Results

### Quantitative methods

**Registration.** At registration, we collected the following details from each attendee: name, institution and contact number or email address. A total of 267 participants were registered for the six events. A total of 69 participants were registered in the February event, 49 on 15<sup>th</sup> May, 2018, 27 on 16<sup>th</sup> May, 36 on 17<sup>th</sup> May, 13 on 19<sup>th</sup> May and 55 on 23<sup>rd</sup> August, 2018). The single-night events were most well attended and the event held in Thai language had the fewest number of attendees.

**General characteristics of questionnaire respondents.** Of the 180 questionnaires handed out, only 125 attendees completed the questionnaire. A total of 55 participants either did not complete the questionnaire or only partially completed it. An equal proportion of male and female participated in the questionnaire (male: 63/125; 50.4%, 61/125; 48.8% and other: 1/125; 0.8%) (Table 3). The mean age of the participants was 34 years and the age ranged between 20 to 78 years. Almost half (61/125; 49.6%) of the participants were Thai. The majority of

participants were Asians (83/125; 67.5%), and almost half of them work or study in science-related fields (67/125; 53.6%).

**Knowledge about the event and previous attendance.** With regard to how attendees have heard about the events, the most frequent source of information was from friends (54/125; 43.2%), followed by Facebook (34/125; 27.2%), PoST organizing committee members (24/125; 19.2%) and the PoST Meetup website (15/125; 12%) (Table 3). Of the 125 participants, a quarter (32/125; 25.6%) had attended the PoST 2017 events, followed by PoST Shots event in February 2018 (13/125; 10.4%), Science Cafés (7/125; 5.6%) and the MORU-organized Thai Geographic Information System meetups (<https://thaigis.net/>) (6/125; 4.8%).

**Reasons for the participation and perceived benefits of attending Pint of Science events.** When asked about the reasons for participation, the following were the most frequent responses: “Interested in science” (85/125; 68.0%), “want to learn and improve my knowledge” (58/125; 46.4%), and “came to enjoy the event” (56/125; 44.8%) (Table 4 and Fig 1). Majority of attendees responded that they made new contacts (87/125; 69.6%) and exchanged scientific knowledge (73/125; 58.4%). Respondents were also able to network with both scientists and non-scientists (29/125; 23.2%) and many participated by asking questions (35/125; 28.2%).

**Overall audience scores and associated factors.** Respondents were asked to rate the event on a likert scale (each question’s score ranged from 0 to 5) based on the following: if they learnt any new knowledge from the event, the event enhanced their interest in science, the extent they enjoyed the event and overall ratings on the venue, speakers, timing, content and opportunity for interactions (Table 4 and Fig 2). The total maximum score was 40, minimum was 18, and the median score was 35. The reasons for participation which showed higher median scores were: 1. “I have an interest in science” (Yes: median score 35.2 versus No: 33.6; p-value = 0.03), 2. “Came to enjoy the event” (Yes: median score 35.5 versus No: 34.0; p-value = 0.02) and 3. “Want to learn and improve my knowledge” (Yes: median score 35.5 versus No: 34.0; p-value = 0.01).

**Knowledge before and after the event.** In response to whether attendees had previous knowledge on the topics presented and if they learnt new knowledge related to the topic, a significant difference in mean score was noted (prior knowledge: mean score = 2.5 versus learnt new knowledge: mean score = 4.1; p-value < 0.001) (Fig 3).

**Qualitative methods.** A total of 11 attendees (7 women and 4 men) participated in semi-structured interviews (SSIs) and 3 attendees participated in a FGD (Table 2). The results of SSIs and FGDs as well as the free text section of the questionnaire are presented according to three themes: entertainment value, benefits of the event, and recommendations for future improvements.

**Entertainment value.** Audience members appreciated the entertainment value of the event. The majority of people we interviewed enjoyed the event. Their experiences were often related to the way the presentations were made in terms of how speakers chose simple language together with the relaxing atmosphere i.e. non-formal settings with snacks and soft drinks provided.

*I think so far, [including] last year and this year and yesterday speakers [all] three of them, I think they are pretty entertaining so I think they are the main sources of the entertainment for this event really. That makes really well. They're entertaining by them self and I think you should choose right people not only for their knowledge but also for their entertainment. That's really nice and I think you also do a good job for not only entertainment but relaxing people. I think people [were] calm, easy. . . . and the environment and simple snacks that [were] provided so [that] people don't have to hang out on an empty stomach that's really relaxing. I think the combination is good for entertaining.*



**Table 3. Total audience's scores in relation to their characteristics (n = 125).**

| Characteristics                                     | Number (%) | Median score | p-value |
|-----------------------------------------------------|------------|--------------|---------|
| <b>Gender</b>                                       |            |              |         |
| Male                                                | 63 (50.4)  | 34.3         | 0.3     |
| Female                                              | 61 (48.8)  | 35.1         |         |
| Other                                               | 1 (0.8)    | 34           |         |
| <b>Age Group</b>                                    |            |              |         |
| ≤31 years                                           | 70 (56)    | 35.4         | 0.06    |
| ≥32 years                                           | 55 (44)    | 33.8         |         |
| Mean = 34±11.56, median = 30, min = 20 and max = 78 |            |              |         |
| <b>Nationality</b>                                  |            |              |         |
| Thai                                                | 61 (49.6)  | 34.6         | 0.51    |
| Non-Thai                                            | 62 (50.4)  | 34.8         |         |
| <b>Continent</b>                                    |            |              |         |
| Asian                                               | 83 (67.5)  | 34.4         | 0.18    |
| African                                             | 3 (2.4)    | 37.3         |         |
| European                                            | 14 (11.4)  | 35.9         |         |
| North American                                      | 22 (17.9)  | 34.7         |         |
| Australian                                          | 1 (0.8)    | 35           |         |
| <b>Institution</b>                                  |            |              |         |
| From Thailand                                       | 77 (61.6)  | 34.9         | 0.95    |
| Not from Thailand                                   | 8 (6.4)    | 35.2         |         |
| Not reported                                        | 40 (32)    | 34.3         |         |
| <b>Occupation</b>                                   |            |              |         |
| Related to Science                                  | 67 (53.6)  | 34.2         | 0.58    |
| Unrelated to Science                                | 58 (46.4)  | 35.3         |         |
| <b>Travel time in mins</b>                          |            |              |         |
| ≤30 mins                                            | 79 (66.4)  | 34.9         | 0.9     |
| ≥31 mins                                            | 40 (33.6)  | 34.6         |         |
| <b>Heard about the events from</b>                  |            |              |         |
| <b>Friends</b>                                      |            |              |         |
| Yes                                                 | 54 (43.2)  | 34.9         | 0.53    |
| No                                                  | 71 (56.8)  | 34.5         |         |
| <b>Facebook</b>                                     |            |              |         |
| Yes                                                 | 34 (27.2)  | 34.5         | 0.76    |
| No                                                  | 91 (72.8)  | 34.8         |         |
| <b>Twitter</b>                                      |            |              |         |
| Yes                                                 | 1 (0.8)    | 34.7         | 0.91    |
| No                                                  | 124 (99.2) | 40           |         |
| <b>Meetup</b>                                       |            |              |         |
| Yes                                                 | 15 (12)    | 33.8         | 0.9     |
| No                                                  | 110 (88)   | 34.8         |         |
| <b>Organizers</b>                                   |            |              |         |
| Yes                                                 | 24 (19.2)  | 35.6         | 0.42    |
| No                                                  | 101 (80.8) | 34.5         |         |
| <b>Website</b>                                      |            |              |         |
| Yes                                                 | 4 (3.2)    | 34.7         | 0.76    |
| No                                                  | 121 (96.8) | 34.7         |         |

Median score = 35, Min = 18 and Max = 40

<https://doi.org/10.1371/journal.pone.0219983.t003>

Table 4. Total audience's scores in relation to their experience and feedback (n = 125).

| Characteristics                                  | Number (%) | Median score | p-value     |
|--------------------------------------------------|------------|--------------|-------------|
| <b>Have attended following events in past</b>    |            |              |             |
| <b>PoST 2017</b>                                 |            |              |             |
| Yes                                              | 32 (25.6)  | 34.5         | 0.73        |
| No                                               | 93 (74.4)  | 34.8         |             |
| <b>PoST Shots (February 2018)</b>                |            |              |             |
| Yes                                              | 13 (10.4)  | 34.8         | 0.84        |
| No                                               | 112 (89.6) | 34.7         |             |
| <b>Science Cafes</b>                             |            |              |             |
| Yes                                              | 7 (5.6)    | 36.1         | 0.77        |
| No                                               | 118 (94.4) | 34.6         |             |
| <b>Thai GIS</b>                                  |            |              |             |
| Yes                                              | 6 (4.8)    | 32.5         | 0.31        |
| No                                               | 119 (95.2) | 34.8         |             |
| <b>Did not attend any</b>                        |            |              |             |
| Yes                                              | 80 (64)    | 34.8         | 0.31        |
| No                                               | 45 (36)    | 34.5         |             |
| <b>Why do you attend?</b>                        |            |              |             |
| <b>I have interest in science</b>                |            |              |             |
| Yes                                              | 85 (68)    | 35.2         | <b>0.03</b> |
| No                                               | 40 (32)    | 33.6         |             |
| <b>Came to enjoy the event</b>                   |            |              |             |
| Yes                                              | 56 (44.8)  | 35.5         | <b>0.02</b> |
| No                                               | 69 (55.2)  | 34           |             |
| <b>Want to learn and improve my knowledge</b>    |            |              |             |
| Yes                                              | 58 (46.4)  | 35.5         | <b>0.01</b> |
| No                                               | 67 (53.6)  | 34.0         |             |
| <b>To network with scientists/non-scientists</b> |            |              |             |
| Yes                                              | 29 (23.2)  | 35.7         | 0.28        |
| No                                               | 96 (76.8)  | 34.4         |             |
| <b>Just visited</b>                              |            |              |             |
| Yes                                              | 5 (4)      | 32.4         | 0.49        |
| No                                               | 120 (96)   | 34.8         |             |
| <b>Did you make new contacts?</b>                |            |              |             |
| Yes                                              | 87 (69.6)  | 35.1         | 0.27        |
| No                                               | 36 (28.8)  | 34           |             |
| Other                                            | 2 (1.6)    | 29           |             |
| <b>Did you exchange scientific knowledge?</b>    |            |              |             |
| Yes                                              | 73 (58.4)  | 35.5         | 0.22        |
| No                                               | 51 (40.8)  | 33.7         |             |
| Other                                            | 1 (0.8)    | 27           |             |
| <b>Did you ask questions?</b>                    |            |              |             |
| Yes                                              | 35 (28.2)  | 34.6         | 0.53        |
| No                                               | 88 (71)    | 34.8         |             |
| Other                                            | 1 (0.8)    | 27           |             |

Median score = 35, Min = 18 and Max = 40

<https://doi.org/10.1371/journal.pone.0219983.t004>



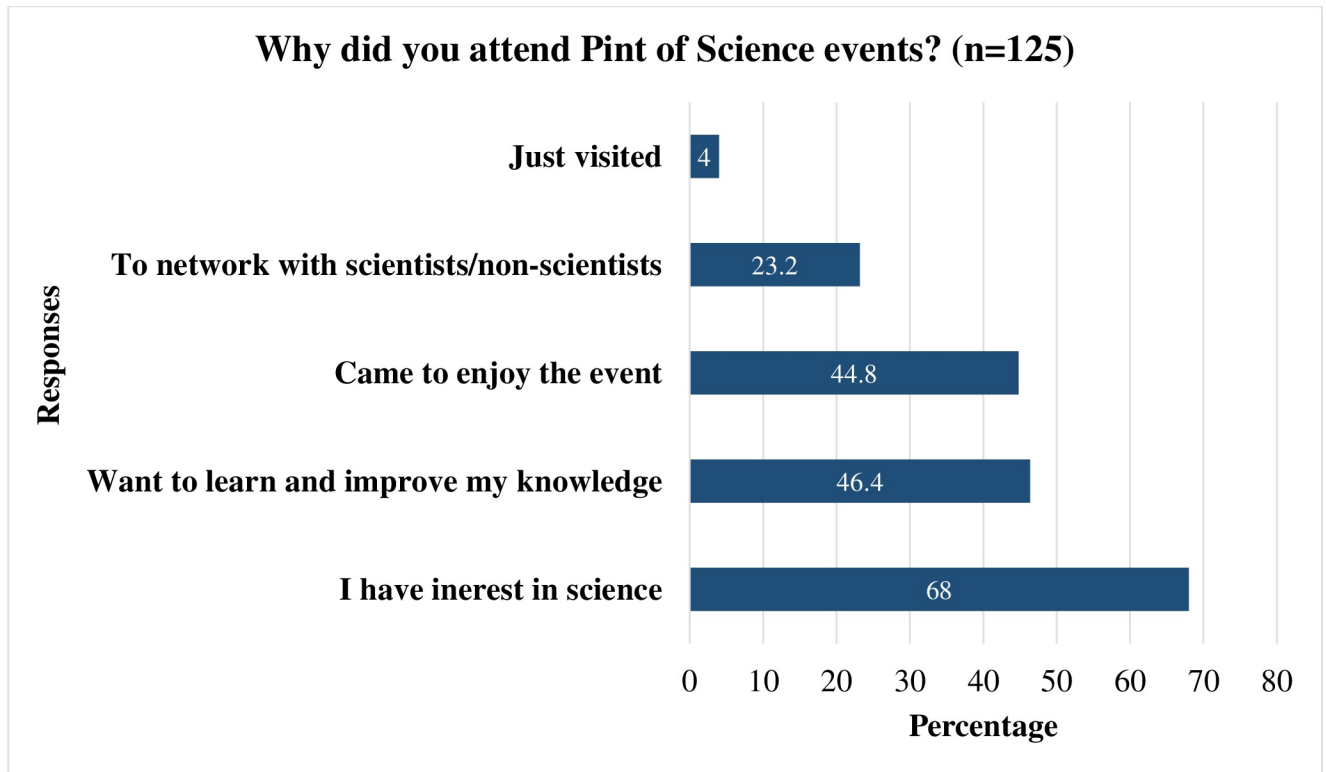

**Fig 1. Responses by attendees about the reasons for participation.** The figure consists of ‘Yes’ responses to the options presented.

<https://doi.org/10.1371/journal.pone.0219983.g001>

25–35 year old, female, engineer, audience member, SSI

Audience members also commented on how science lectures ought to be blended with arts, entertainment and story-telling in order to convey the message and make science more interesting.

*.....yeah that's your part of resume, when you went to the school, undergrad or graduate program they don't give you like an entertainment value but for science to get a bigger audience the scientists should be a better entertainer, better storyteller to help carry the rest of the people that's how people work.*

35–40 year old, male, businessman, audience member, SSI

**Benefits of the event.** Several benefits were mentioned by audience members for example how speakers were able to help them understand complex scientific concepts. In addition, audience members appreciated how science was explained in a way that is applicable in their day-to-day lives. For instance, the evolutionary adaptation of bacteria and its relevance to understanding of superbugs was found to be interesting.

*I do love the way the speakers picked interesting topics, mostly hard to understand by reading it myself, and clarify it in the easiest way. It can make people love science more, as science can explain many facts in our daily living. For example, why this bacteria have to transform their structure for living.*

25–30 year old, male, science student, audience member, SSI

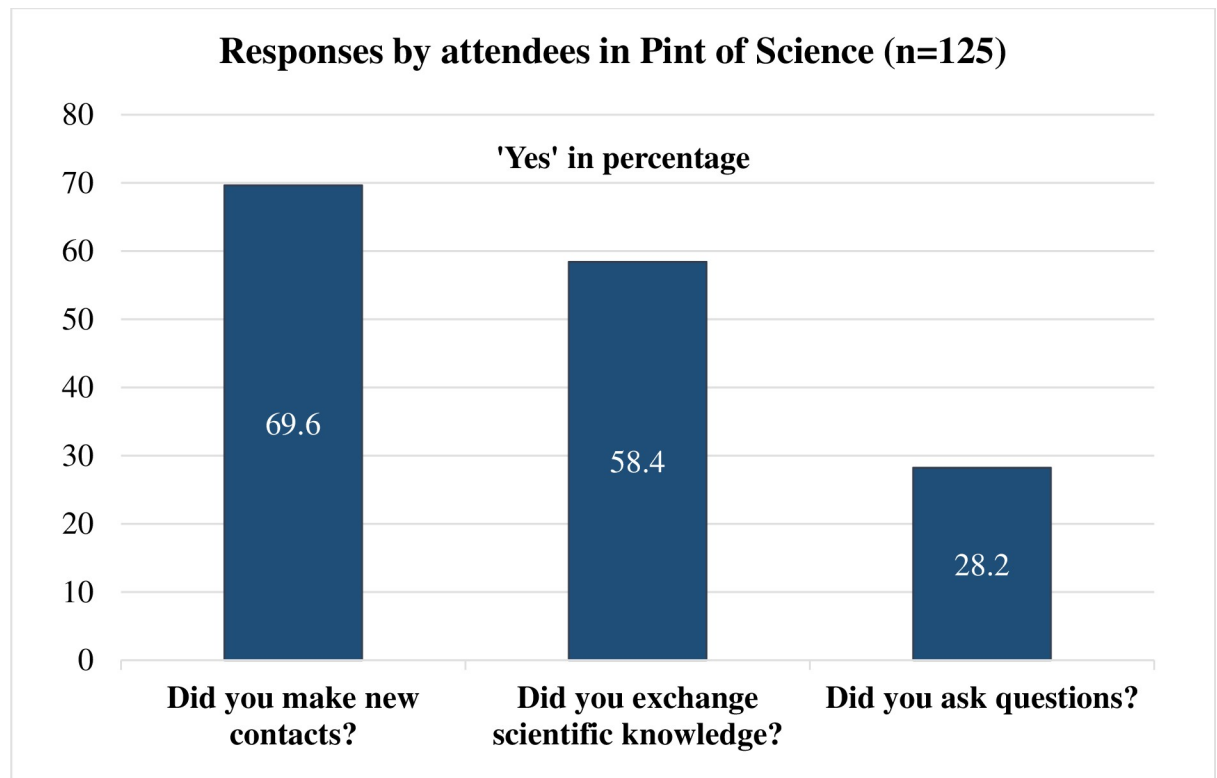

**Fig 2. Responses to questions by attendees.** The figure consists of 'Yes' responses to the questions asked.

<https://doi.org/10.1371/journal.pone.0219983.g002>

Consider this quote by an audience member who was referring to a talk on antimicrobial resistance. She explained how beneficial it was to be aware of the harms of misusing antibiotics.

*The lay person didn't know much about the antibiotics, but from this event, they will know how and when they should use antibiotics*

20–25 year old, female, non-science student, audience member, FGD

Many speakers said that they benefited from participating in PoST by improving their communication skills and having the opportunity to network with scientists and non-scientists. In addition, speakers mentioned that such events were a good means to engage with the public, can improve the visibility of their work and potentially attract more funding.

*You can look at the benefits for the speakers; it increases their profile. And you could say you contributed in some sort of public engagement. . . . . You know it might sound selfishly but if people know your research more, you probably have chance to receive more funding,*

30–35 year old, female, research physician, presenter, SSI

In addition, audience members mentioned how such events were helpful in providing information on topics that they would not normally be exposed to.

*I have to say to be fair it was an opportunity for me to be exposed to other topics I wouldn't necessarily go out of my way to look and try to discover and understand more. So these events*

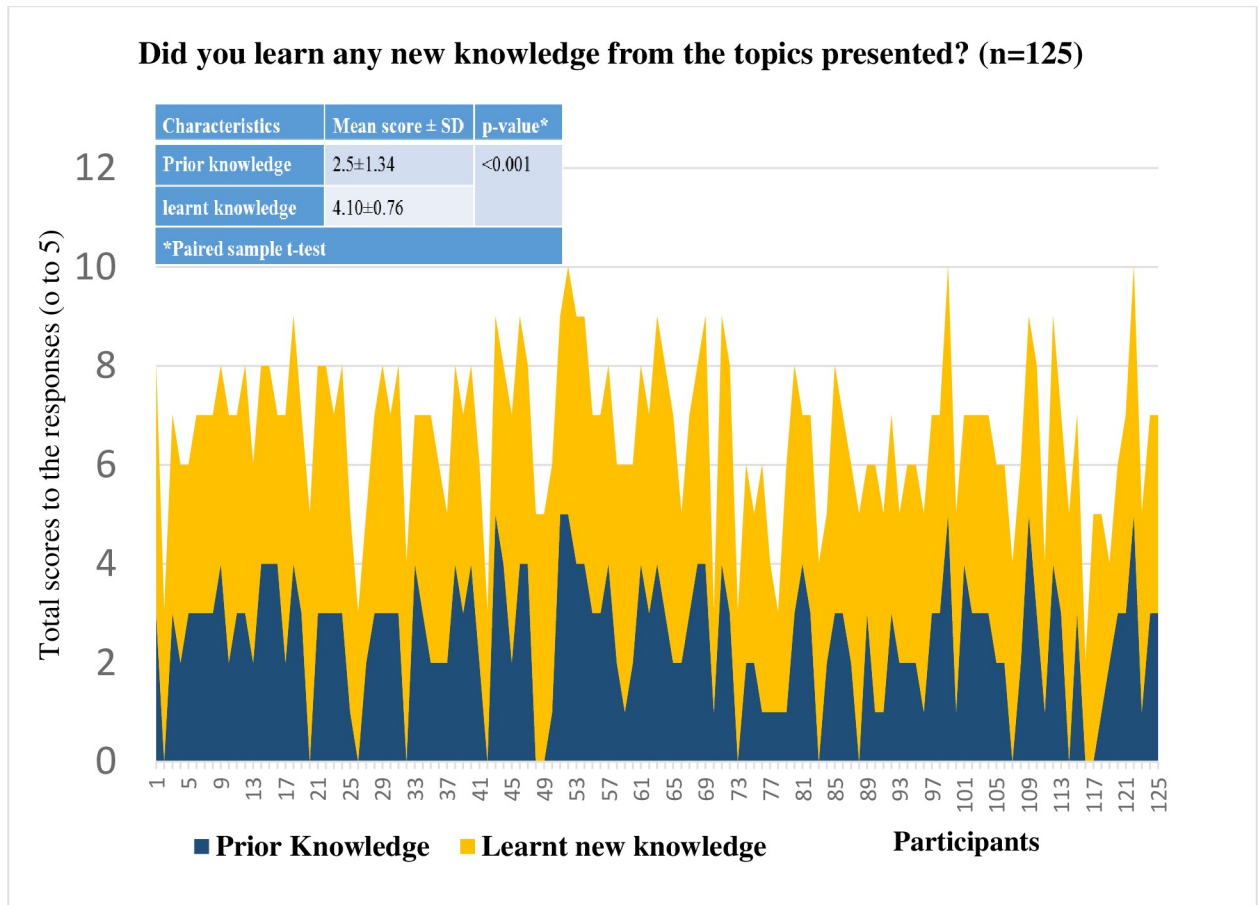

**Fig 3. Prior knowledge and learnt knowledge about the topics presented in Pint of Science events.**

<https://doi.org/10.1371/journal.pone.0219983.g003>

*have... sort of many benefits. ... I guess, you cannot express everything. . . but you are also a little bit of awestruck while other people talking to you, teaching you the new things you didn't know before. That's why I found out very good and interesting.*

25–30 year, male, physician, audience member, SSI

Some members of the audience members also highlighted that “live” events have benefits that cannot be found from other sources such as the internet. They particularly enjoyed the interactive nature of the talks.

**Recommendations for future improvements.** Many audience members were happy about the organization of the event in terms of speakers, venue and the benefits of such events. Nevertheless, on prompting how we could improve such events in future, audience members had the following suggestions.

*I think the topics are very (very) great and those are interesting but make sure to include more variety in topic range because what I have listened on that event is mostly about medical science and from MORU so I think maybe we have to include more stuffs like different topics from different Institute and we can make it more varied in range.*

20–25, male, science student, audience member, FGD

In addition, many audience members suggested that we should increase our promotion of the events among university students and on social media.

*One thing I have to suggest to make it better for this event is that to make more people know this event maybe you should get a contact with some institutes in your area like Chulalongkorn University or any other. You know that this is the good thing or maybe you're running this event with one of the speakers who have given the talk and you post that talk on Facebook. Or maybe you can make some people watch [in Facebook/Youtube] and then they feel like all these events are cool and they will be like I would like to get there to receive some interesting topics tomorrow or maybe other day.*

20–25, male, science student, audience member, FGD

Other recommendations were related to some of the technical and logistics aspects such as improvements on audio-visuals (e.g. microphone) and chair arrangements (need for more spacious arrangement). The common recommendations for all events were more availability of (free) beverages, need for bigger space, longer breaks in between talks and accessibility by public transport such as the Bangkok Sky Train (BTS).

## Discussion

Globally, despite the growing number of public engagement activities, there is still a lack of published literature on the evaluation of such events. In 2018, Pint of Science (PoS) was held in 21 countries but as far as we know, this is the first paper that reports the quantitative and qualitative evaluation results from both organizers and the audience members who participated. Previous PoS publications consisted mainly of reflections from the organizing committee [2, 19].

The event held in Thai had the fewest number of attendees despite that they were advertised in both Thai and English on Pint of Science web pages and held in central Bangkok [4]. One explanation was that most scientific work and literature is in English, and that most people interested in science speak and work professionally in English. In 2017, we intended to hold the PoST events in dual language with at least one talk per night in Thai with hosting done in both Thai and English [4]. However, because all audience members could understand English, two out of three Thai language presenters decided to present their talks in English despite having prepared their talks in Thai.

Another possible reason for low attendance for the Thai language event is the time and location. It was held on a Saturday afternoon and a different part of the city from the English language events. Location and environment have been identified as determinants for high or low attendance figures [8]. For example, “Nerd Nite” events in Hong Kong have been very well attended due to the location of the events—a bar right in the heart of the business and finance district [8].

Although assessments were not specifically made in regards to socio-economic status of the participants, in general the PoST events were participated by those who were affiliated to science related fields or the participants who speak and understand English. This suggests that such events primarily attract audiences from middle to higher income group, and have higher level of education. This phenomenon has been highlighted by others [25].

Both the survey and qualitative component of the evaluation showed that audience members attended PoST because of their interest in science, its entertainment value and their desire to learn; our study shows that audience members indeed enjoyed the event and perceived that they have increased their knowledge. These findings were consistent with evaluations of

similar initiatives as the science café-like programs in Cambodia [6], Hong Kong [8], USA [26, 27], the Netherlands [28] and participation in science festivals in the UK [29, 30].

Both attendees and presenters expressed that PoST events provided an opportunity for interaction between scientists and the public. The many questions from the audience and the lively discussions following the talks reinforces this finding. This is consistent with the aims of PoS which is to “provide a platform which allows people to discuss research with the people who carry it out and no prior knowledge of the subject is required” [1].

For presenters, the experience of presenting their work to a lay audience had the benefit in that they could improve their presentation and communication skills, expand their network, enhance their public profile, and potentially increase their opportunities for future funding. These benefits have been frequently echoed around the globe in relation to public engagement activities [31–33]. Others have noted that for junior researchers, having public engagement experience is an advantage in their CV [2].

This study also showed that audience members perceived that they gained knowledge on specific topics presented. The perceived gain in knowledge does not necessarily mean that they actually gain knowledge or translate their knowledge to behavior change, however, the perceived change in itself is highly valued aspects of such events [29, 34]. It is also likely that the perceived knowledge gain or the changes may be minimal to an audience member who has high prior knowledge and may not learn new knowledge from the topics presented. In addition, the gain in knowledge in the topics presented does not necessarily reflect the critical scientific literacy amongst audience [35]. Although public engagement events such as PoST contribute to science literacy, in general such events may not equip audience with critical scientific literacy necessary to understand the mechanisms how science related evidence are produced, their interpretations and the caveats [35].

Critical evaluation through recommendations and feedback of the PoST events by participants is indispensable for future improvements. Many of those we interviewed suggested that one way to increase the reach and range of topics and its diversity is to increase collaborations with local research institutions and universities. These findings are consistent with recommendations from the PoST team [2].

Other suggestions were related to the practicalities and logistics of holding the events, for example many wanted bigger venues that are easily accessible by public transport (BTS in the case of Bangkok), and longer break-time for interactions between scientists and audience members. Events with longer break time with venues accessible to the general population were found to be conducive factors to enhance the participation in Hong Kong [8]. These suggestions will be incorporated into the planning of subsequent years' events.

This study has several strengths. As far as we know, this is the first formal evaluation of PoST. Findings were triangulated by using both quantitative and qualitative methods. In order to minimize social desirability bias, the questionnaires were self-administered. In addition, all SSIs and FGDs were conducted in locations chosen by the interviewee and often in non-formal settings such as cafés.

This study also has several limitations. Since the data were derived from those who participated in PoST activities, self-selection bias was inevitable. In addition, this was a cross-sectional study and therefore, the data represent the immediate impression about these activities. We also acknowledge that the evaluation was conducted by the organizers of PoST, and therefore not independent. The findings from this study need to be interpreted cautiously as the feedback and reflections presented in this study may be applicable to these self-selected groups of attendees. In future, we may consider having independent evaluators.

## Conclusion

Pint of Science Thailand was found to be enjoyable by speakers and audience members alike. Audience members found the events to be beneficial in that they gained additional knowledge, got the opportunity to interact with scientists and discuss science. To improve PoST activities, audience members suggested to include a diverse range of topics, more collaborations with other local research institutions and bigger venues. PoST was well received with recommendations to improve minor issues related to practicalities and logistics and can be applicable for various other public engagement events conducted worldwide. This study reinforces the benefits of public engagement events in increasing interest in science, building literacy around it, bridging the gaps between scientists and the public, and building capacity of scientists in communication and translation of their work.

## Supporting information

**S1 Table. Pint of Science Thailand questionnaire.**

(PDF)

**S2 Table. Pint of Science Thailand SSI guide.**

(DOCX)

**S3 Table. Pint of Science Thailand FGD guide.**

(DOCX)

## Acknowledgments

We would like to express our thanks to the speakers of PoST and those who participated in the questionnaires, interviews and focus group discussions.

## Author Contributions

**Conceptualization:** Bipin Adhikari, Matthew T. Robinson, Andrea Ruecker, Nattapat Jatupornpimol, Phaik Yeong Cheah.

**Data curation:** Bipin Adhikari, Phyu Hnin Hlaing.

**Formal analysis:** Bipin Adhikari, Phyu Hnin Hlaing.

**Funding acquisition:** Phaik Yeong Cheah.

**Investigation:** Bipin Adhikari, Phyu Hnin Hlaing, Nattapat Jatupornpimol, Rita Chanviriyavuth, Phaik Yeong Cheah.

**Methodology:** Bipin Adhikari, Phyu Hnin Hlaing, Nattapat Jatupornpimol, Phaik Yeong Cheah.

**Project administration:** Bipin Adhikari, Matthew T. Robinson, Andrea Ruecker, Noel Hidalgo Tan, Nattapat Jatupornpimol, Rita Chanviriyavuth, Phaik Yeong Cheah.

**Resources:** Matthew T. Robinson, Andrea Ruecker, Noel Hidalgo Tan, Nattapat Jatupornpimol, Rita Chanviriyavuth, Phaik Yeong Cheah.

**Software:** Bipin Adhikari, Phyu Hnin Hlaing.

**Supervision:** Bipin Adhikari, Matthew T. Robinson, Andrea Ruecker, Noel Hidalgo Tan, Nattapat Jatupornpimol, Rita Chanviriyavuth, Phaik Yeong Cheah.

**Validation:** Phyu Hnin Hlaing, Matthew T. Robinson, Andrea Ruecker, Noel Hidalgo Tan, Phaik Yeong Cheah.

**Writing – original draft:** Bipin Adhikari.

**Writing – review & editing:** Bipin Adhikari, Phyu Hnin Hlaing, Matthew T. Robinson, Andrea Ruecker, Noel Hidalgo Tan, Nattapat Jatupornpimol, Phaik Yeong Cheah.

## References

1. Pint of Science. About Pint of Science. Available online at: <https://pintofscience.com/about/> (Accessed on 6th January, 2019). 2019.
2. Richter K, Thomas N. Science in the Eye of the Beer-Holder-How To Put On an Effective Pint of Science: The Adelaide Experience. *J Microbiol Biol Educ.* 2018; 19(1). Epub 2018/06/16. <https://doi.org/10.1128/jmbe.v19i1.1539> PMID: 29904534; PubMed Central PMCID: PMC5969420.
3. Paul P, Motskin M. Engaging the Public with Your Research. *Trends Immunol.* 2016; 37(4):268–71. Epub 2016/03/25. <https://doi.org/10.1016/j.it.2016.02.007> PMID: 27011231.
4. Pint of Science Thailand. Pint of Science Thailand. Available online at <https://www.pintofscienceth.com/> (Accessed on 6th January, 2019). 2019.
5. Dallas D. Cafe Scientifique—deja vu. *Cell.* 2006; 126(2):227–9. Epub 2006/07/29. <https://doi.org/10.1016/j.cell.2006.07.006> PMID: 16873050.
6. Pol S, Fox-Lewis S, Cheah PY, Turner C. "Know your audience": A hospital community engagement programme in a non-profit paediatric hospital in Cambodia. *PLoS One.* 2017; 12(8):e0182573. Epub 2017/08/05. <https://doi.org/10.1371/journal.pone.0182573> PMID: 28771631; PubMed Central PMCID: PMC5542539.
7. Cheah PY, Newton PN, Mayxay M. The first Science Cafe in Laos. *Lancet.* 2016; 388(10052):1376. Epub 2016/10/07. [https://doi.org/10.1016/S0140-6736\(16\)31742-1](https://doi.org/10.1016/S0140-6736(16)31742-1) PMID: 27707495.
8. Tan SZK, Perucho JAU. Bringing science to bars: a strategy for effective science communication. *science communication.* 2018; 40(6):819–26.
9. Adhikari B, Pell C, Phommason K, Soundala X, Kommarasy P, Pongvongsa T, et al. Elements of effective community engagement: lessons from a targeted malaria elimination study in Lao PDR (Laos). *Glob Health Action.* 2017; 10(1):1366136. Epub 2017/09/16. <https://doi.org/10.1080/16549716.2017.1366136> PMID: 28914184; PubMed Central PMCID: PMC5645700.
10. Adhikari B, Phommason K, Kommarasy P, Soundala X, Souvanthong P, Pongvongsa T, et al. Why do people participate in mass anti-malarial administration? Findings from a qualitative study in Nong District, Savannakhet Province, Lao PDR (Laos). *Malaria journal.* 2018; 17(1):15. Epub 2018/01/11. <https://doi.org/10.1186/s12936-017-2158-4> PMID: 29316932; PubMed Central PMCID: PMC5761145.
11. Adhikari B, Phommason K, Pongvongsa T, Kommarasy P, Soundala X, Henriques G, et al. Factors associated with population coverage of targeted malaria elimination (TME) in southern Savannakhet Province, Lao PDR. *Malaria journal.* 2017; 16(1):424. Epub 2017/10/25. <https://doi.org/10.1186/s12936-017-2070-y> PMID: 29061133; PubMed Central PMCID: PMC5653989.
12. Kajeewiwa L, Thwin MM, Nosten S, Tun SW, Parker D, von Seidlein L, et al. Community engagement for the rapid elimination of malaria: the case of Kayin State, Myanmar. *Wellcome Open Res.* 2017; 2:59. Epub 2017/09/13. <https://doi.org/10.12688/wellcomeopenres.12051.1> PMID: 28894847; PubMed Central PMCID: PMC5580421.
13. Pell C, Tripura R, Nguon C, Cheah P, Davoeung C, Heng C, et al. Mass anti-malarial administration in western Cambodia: a qualitative study of factors affecting coverage. *Malaria journal.* 2017; 16(1):206. Epub 2017/05/21. <https://doi.org/10.1186/s12936-017-1854-4> PMID: 28526019; PubMed Central PMCID: PMC5438518.
14. Sahan K, Pell C, Smithuis F, Phyo AK, Maung SM, Indrasuta C, et al. Community engagement and the social context of targeted malaria treatment: a qualitative study in Kayin (Karen) State, Myanmar. *Malaria journal.* 2017; 16(1):75. Epub 2017/02/16. <https://doi.org/10.1186/s12936-017-1718-y> PMID: 28196536; PubMed Central PMCID: PMC5310060.
15. Nguon C, Dysoley L, Davoeung C, Sovann Y, Sanann N, Sareth M, et al. Art and theatre for health in rural Cambodia. *Glob Bioeth.* 2018; 29(1):16–21. Epub 2017/12/19. <https://doi.org/10.1080/11287462.2017.1411762> PMID: 29249920; PubMed Central PMCID: PMC5727450.
16. Lim R, Peto TJ, Tripura R, Cheah PY. Village Drama Against Malaria. *Lancet.* 2016; 388(10063):2990. Epub 2016/12/22. [https://doi.org/10.1016/S0140-6736\(16\)32519-3](https://doi.org/10.1016/S0140-6736(16)32519-3) PMID: 27998527.



17. Pell CL, Adhikari B, Myo Thwin M, Kajeechiwa L, Nosten S, Nosten FH, et al. Community engagement, social context and coverage of mass anti-malarial administration: Comparative findings from multi-site research in the Greater Mekong sub-Region. *PLoS One*. 2019; 14(3):e0214280. Epub 2019/03/26. <https://doi.org/10.1371/journal.pone.0214280> PMID: 30908523; PubMed Central PMCID: PMC6433231.
18. Cheah P, Jatupornpimol N, Suarez-Idueta L, Hawryszkiewicz A, Charoenboon N, Khirikoekkong N, et al. Understanding a science-themed puppet theatre performance for public engagement in Thailand [version 1; referees: 1 approved, 1 approved with reservations]. 2018; 3(7). <https://doi.org/10.12688/wellcomeopenres.13239.1>
19. Robinson MT, Jatupornpimol N, Sachaphimukh S, Lönnkvist M, Ruecker A, Cheah PY. The First Pint of Science Festival in Asia. *Science Communication*. 2017; 39(6):810–20. <https://doi.org/10.1177/1075547017739907> PMID: 30369782
20. Boynton PM, Greenhalgh T. Selecting, designing, and developing your questionnaire. *BMJ*. 2004; 328(7451):1312–5. Epub 2004/05/29. <https://doi.org/10.1136/bmj.328.7451.1312> PMID: 15166072; PubMed Central PMCID: PMC420179.
21. Spicer S. The nuts and bolts of evaluating science communication activities. *Semin Cell Dev Biol*. 2017; 70:17–25. Epub 2017/08/22. <https://doi.org/10.1016/j.semcdb.2017.08.026> PMID: 28823946.
22. Spicer S. Evaluating your engagement Developing an evaluation plan. Available online at: [http://www.engagement.manchester.ac.uk/resources/guides\\_toolkits/Writing-an-evaluation-plan-for-PE.pdf](http://www.engagement.manchester.ac.uk/resources/guides_toolkits/Writing-an-evaluation-plan-for-PE.pdf) (accessed 21st September, 2018). 2012.
23. University College London. Evaluation methods for public engagement projects. Available online at: [https://www.ucl.ac.uk/culture/sites/culture/files/100831\\_methods\\_for\\_evaluation.pdf](https://www.ucl.ac.uk/culture/sites/culture/files/100831_methods_for_evaluation.pdf) (accessed on 21st September, 2018).
24. The Wellcome Trust. Evaluating public engagement in the Wellcome Trust's UK Centres. Available online at: [https://wellcome.ac.uk/sites/default/files/wtp059889\\_0.pdf](https://wellcome.ac.uk/sites/default/files/wtp059889_0.pdf) (accessed 21st September, 2018). 2015.
25. Su LY-F, Cacciatore MA, Scheufele DA, Brossard D, Xenos MA. Inequalities in scientific understanding: Differentiating between factual and perceived knowledge gaps. *Science Communication*. 2014; 36(3):352–78.
26. Ahmed S, DeFino MC, Connors ER, Kissack A, Franco Z. Science cafes: engaging scientists and community through health and science dialogue. *Clinical and translational science*. 2014; 7(3):196–200. Epub 2014/04/11. <https://doi.org/10.1111/cts.12153> PMID: 24716626; PubMed Central PMCID: PMC4410806.
27. Balls-Berry JE, Sinicrope PS, Valdez Soto MA, Albertie ML, Lafflam R, Major-Elechi BT, et al. Using Garden Cafes to engage community stakeholders in health research. *PLoS One*. 2018; 13(8):e0200483. Epub 2018/08/11. <https://doi.org/10.1371/journal.pone.0200483> PMID: 30096153; PubMed Central PMCID: PMC6086403.
28. Dijkstra AM, Critchley CR. Nanotechnology in Dutch science cafes: Public risk perceptions contextualised. *Public Underst Sci*. 2016; 25(1):71–87. Epub 2014/05/09. <https://doi.org/10.1177/0963662514528080> PMID: 24812210.
29. Jensen E, Buckley N. Why people attend science festivals: Interests, motivations and self-reported benefits of public engagement with research. *Public Underst Sci*. 2014; 23(5):557–73. Epub 2014/11/22. <https://doi.org/10.1177/0963662512458624> PMID: 25414922.
30. Whitehouse J, Waller BM, Chanvin M, Wallace EK, Schel AM, Peirce K, et al. Evaluation of public engagement activities to promote science in a zoo environment. *PLoS One*. 2014; 9(11):e113395. Epub 2014/11/22. <https://doi.org/10.1371/journal.pone.0113395> PMID: 25415193; PubMed Central PMCID: PMC4240600.
31. GASCOIGNE T, METCALFE J. Incentives and Impediments to Scientists Communicating Through the Media. *Science Communication*. 1997; 18(3):265–82. <https://doi.org/10.1177/1075547097018003005>
32. The Royal Society. Survey of factors affecting science communication by scientists and engineers. 2006.
33. The Wellcome Trust. The Role of Scientists in Public Debate. The Wellcome Trust ([www.mori.com/polls/2000/wellcomepr.shtml](http://www.mori.com/polls/2000/wellcomepr.shtml)). 2000.
34. Irwin A. Risk, science and public communication. *Routledge handbook of public communication of science and technology*. 2014:160–72.
35. Priest S. Critical science literacy: What citizens and journalists need to know to make sense of science. *Bulletin of Science, Technology & Society*. 2013; 33(5–6):138–45.
